# Supplementary material
Source: publisher figshare collection journal article supplement (https://acs.figshare.com/ndownloader/files/3719569)
Supplement: Supplementary file 1 [file 3719569]

## Supporting Information

### **Porous Silicon's Photoactivity in Water: Insights into Environmental Fate**

*Kyle J. Moor,<sup>1</sup> Ezra L. Cates,<sup>2,\*</sup> Jae-Hong Kim<sup>1,\*</sup>*

<sup>1</sup> Department of Chemical & Environmental Engineering, School of Engineering & Applied Science, Yale University, New Haven, CT, 06511

<sup>2</sup> Department of Environmental Engineering & Earth Sciences, College of Engineering and Science, Clemson University, Clemson, SC, 29634

Number of pages: 3

Number of figures: 3

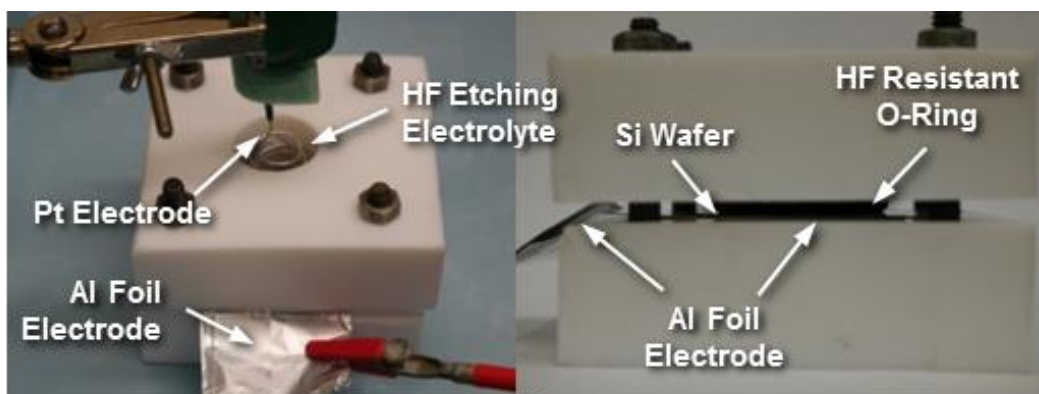

**Figure S1.** Photographic images of the etch cell used for pSi preparation.

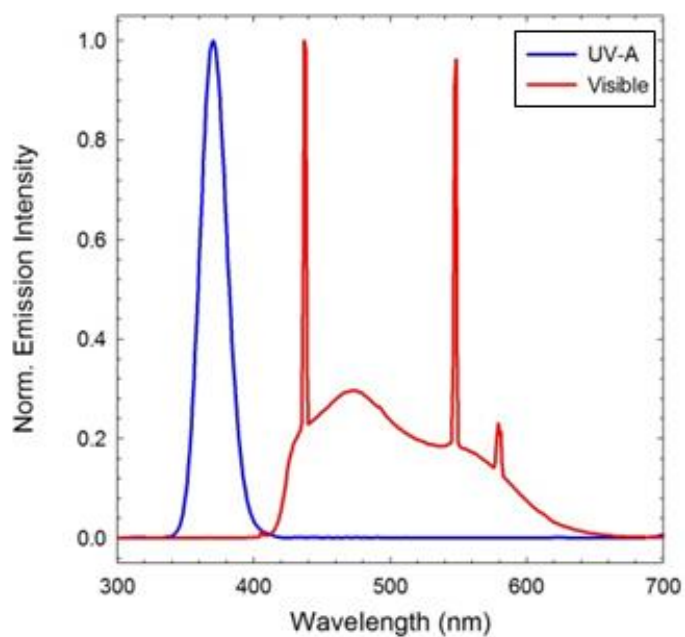

**Figure S2.** Emission spectra of visible (red line) and UV-A (blue line) source lights used for photochemical experiments.

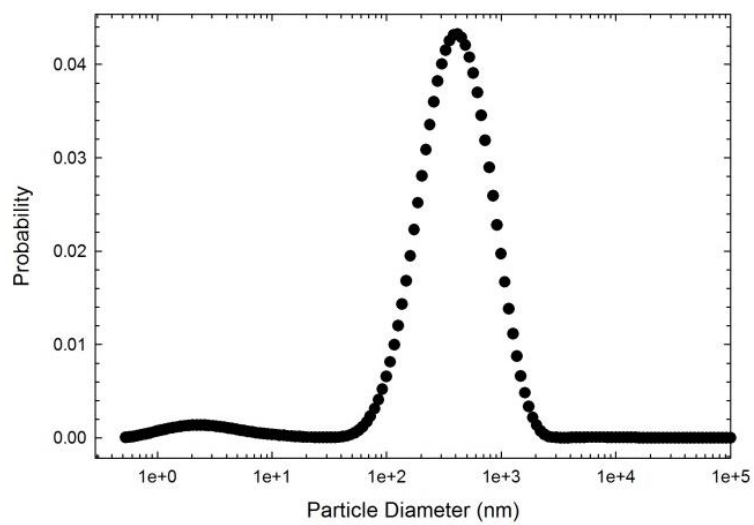

**Figure S3.** DLS size distribution for a representative aqueous pSi sample.
